# Supplementary material
Source: publisher figshare collection journal article supplement (https://frontiersin.figshare.com/ndownloader/files/17461283)

## Supplementary material

**Table S1.** Oligonucleotides used in the present work.

| Primer name          | Sequence                         | Use in the study                                                                                |
|----------------------|----------------------------------|-------------------------------------------------------------------------------------------------|
| A1S_3245UPFw         | ttgcggccgcaagtcacggaacaaatctgag  | Construction of the $\Delta hisF$ mutant                                                        |
| A1S_3245UPRv         | ccggaattccgggttaatactcactttgtctg | Construction of the $\Delta hisF$ mutant                                                        |
| A1S_3245DOWN         | ccggaattccgggtatcgaaatgcgcttgaag | Construction of the $\Delta hisF$ mutant                                                        |
| A1S_3245DOWNRv       | cgcggatccgcggttggcaatttctagccc   | Construction of the $\Delta hisF$ mutant                                                        |
| A1S_3245intUP        | gcctgtgtaggaactttca              | Confirmation of the deletion of the <i>hisF</i> gene                                            |
| A1S_3245intDOWN      | ccactctcctcaagctgta              | Confirmation of the deletion of the <i>hisF</i> gene                                            |
| A1S_3245FwEcoRVCompl | cccgatcatcatgcttgctaaacgtattat   | Cloning the <i>hisF</i> gene into the pWH1266-Km plasmid to complement the $\Delta hisF$ strain |
| A1S_3245RvBamHICompl | cccggatccttacaagcgcatttcgatac    | Cloning the <i>hisF</i> gene into the pWH1266-Km plasmid to complement the $\Delta hisF$ strain |

**Table S2.** Antibiotic susceptibility profile of *A. baumannii* ATCC 17978 and the  $\Delta hisF$  mutant.

| <b>Antibiotic</b> | <b>Zone diameter mean difference (mm)</b> |                                 |
|-------------------|-------------------------------------------|---------------------------------|
|                   | <b>ATCC 17978</b>                         | <b><math>\Delta hisF</math></b> |
| Ampicillin        | 9                                         | 9                               |
| Cefoxitin         | 9                                         | 9                               |
| Ceftazidime       | 20                                        | 21                              |
| Cefepime          | 22                                        | 23                              |
| Imipenem          | 29                                        | 31                              |
| Tigecycline       | 22                                        | 24                              |
| Rifampicin        | 11                                        | 11                              |
| Colistin          | 13                                        | 14                              |
| Ciprofloxacin     | 25                                        | 27                              |
| Gentamicin        | 24                                        | 26                              |

**Figure S1.** Reactions catalyzed by HisH and HisF. The ammonia molecule required for this reaction is provided by the glutaminase HisH which transfers nitrogen from glutamine to form glutamate. Later, PRFAR is converted by HisF into ImGP and AICAR. The second product of the reaction, AICAR, is further used in *de novo* purine biosynthesis and AMPK activation.

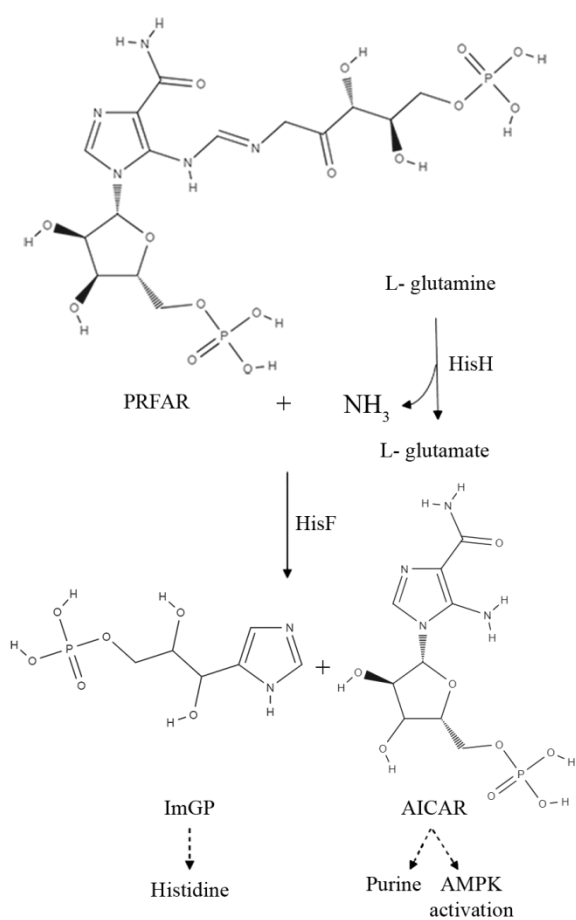

**Figure S2.** *In vitro* assays. A) Quantification of the biofilm formation ability of *A. baumannii* ATCC 17978 strain and the  $\Delta hisF$  mutant derivative strain (N=6, bars represent the standard deviations). B) Quantification of the bacterial adhesion ability to A549 cells of *A. baumannii* ATCC 17978 strain and the mutant derivative strain  $\Delta hisF$  (N=6, bars represent the standard deviations). C) Growth curves of the ATCC 17978 strain, the isogenic mutant derivative strain  $\Delta hisF$ , ATCC 17978 + pWH1266-Km,  $\Delta hisF$  + pWH1266-Km and  $\Delta hisF$  complemented strains. Data correspond to the mean of 4 replicates and bars represent the standard deviations. D) Fluorescence microscopy images of human alveolar A549 cells infected by ATCC 17978 and  $\Delta hisF$  strains after 16 h post-infection.

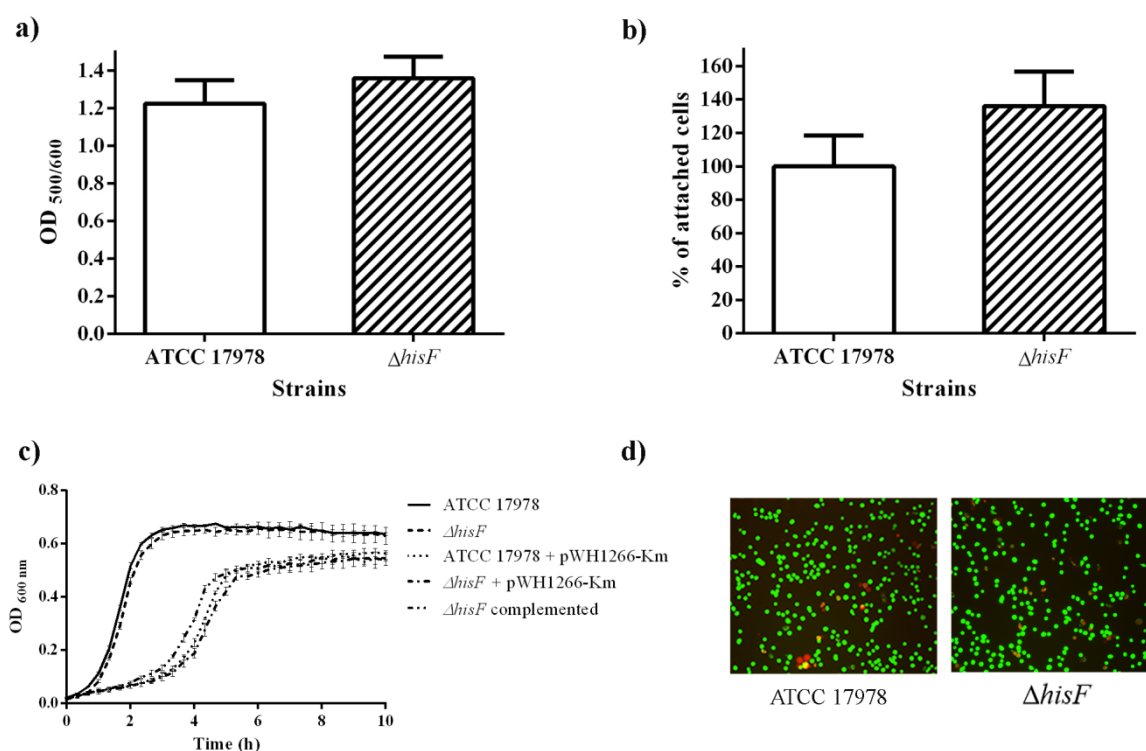

**Figure S3.** *In vivo* assays. A) Experimental murine model of bacteraemia performed with the *A. baumannii* ATCC 17978 and the  $\Delta hisF$  isogenic mutant strains (N=10). B) *G. mellonella* larvae infection model using the *A. baumannii* ATCC 17978 and the  $\Delta hisF$  isogenic mutant strains. Non-infected larvae (PBS) were used as control (N=10).

a)

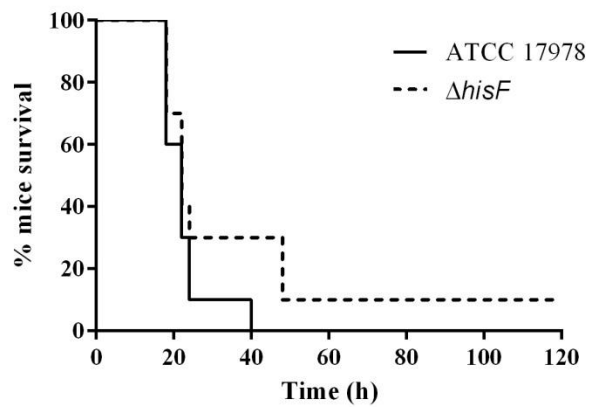

b)

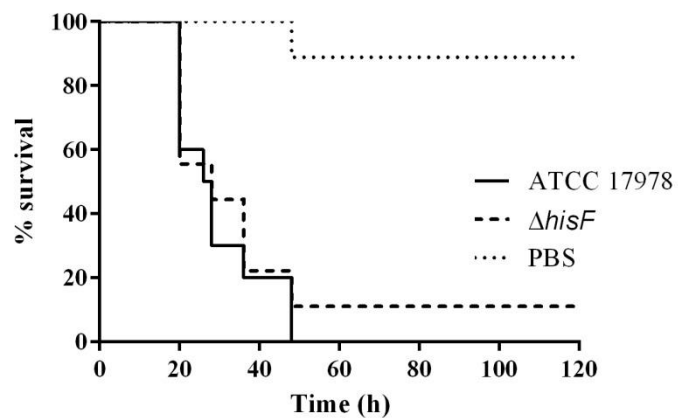

**Figure S4.** Bacterial burden in lungs. Bacterial load determination in lungs of mice infected with the ATCC 17978 and the  $\Delta hisF$  mutant strains (N=8) ( $p<0.01$ ).

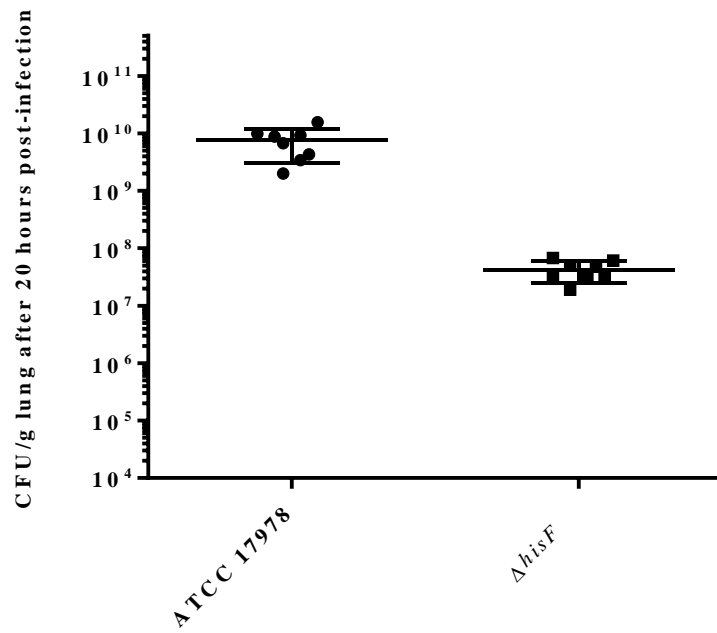

**Figure S5.** Determination of histidine auxotrophy. Curves of viable bacteria were performed with the ATCC 17978 and the  $\Delta hisF$  mutant strains in M9 minimal medium in presence and absence of histidine.

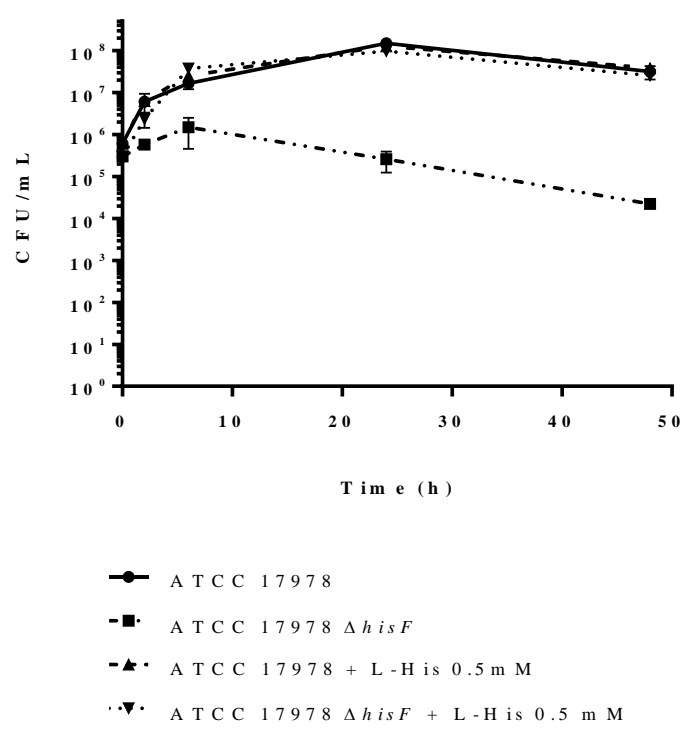

Supplement: Supplementary file [file 17461283]
